# Supplementary material
Source: Springer Nature journal article supplement (https://www.springermedizin.de/resource/supplementary/13054_2012_926_MOESM6_ESM.pdf/9709322)

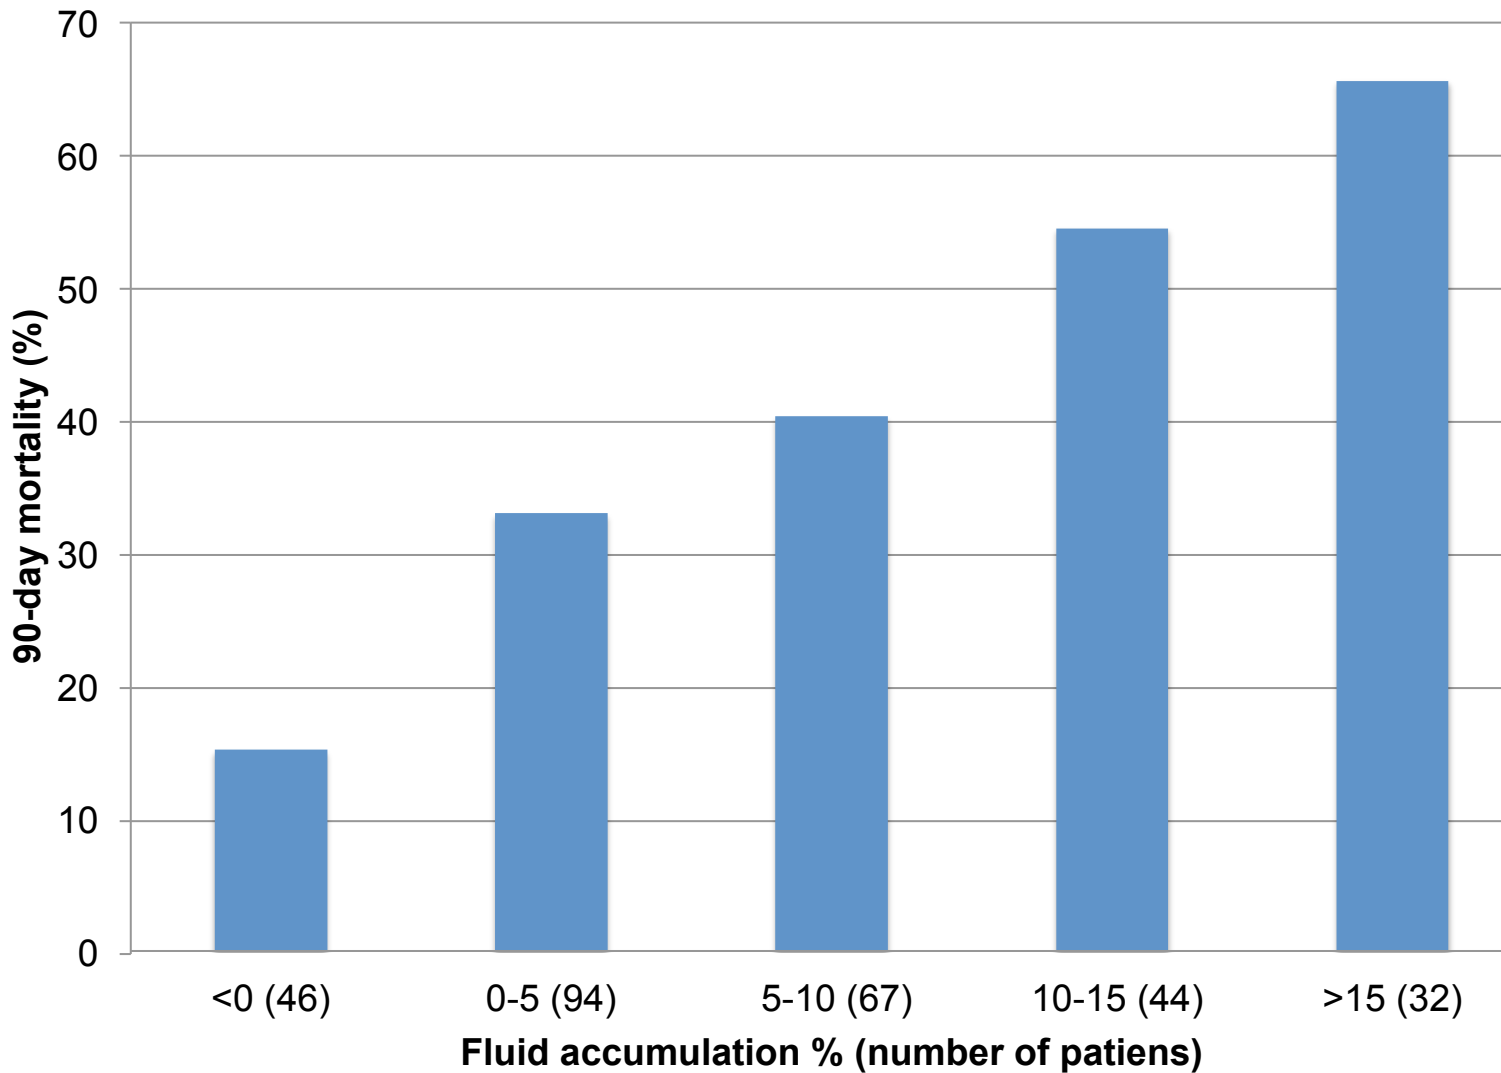

Supplement: MOESM6 [file 9709322]
